# Supplementary figures and images for: De novo Transcriptome of the Non-saxitoxin Producing Alexandrium tamutum Reveals New Insights on Harmful Dinoflagellates
Source: MDPI journal article supplement (doi:10.3390/md18080386), 2020-07-24

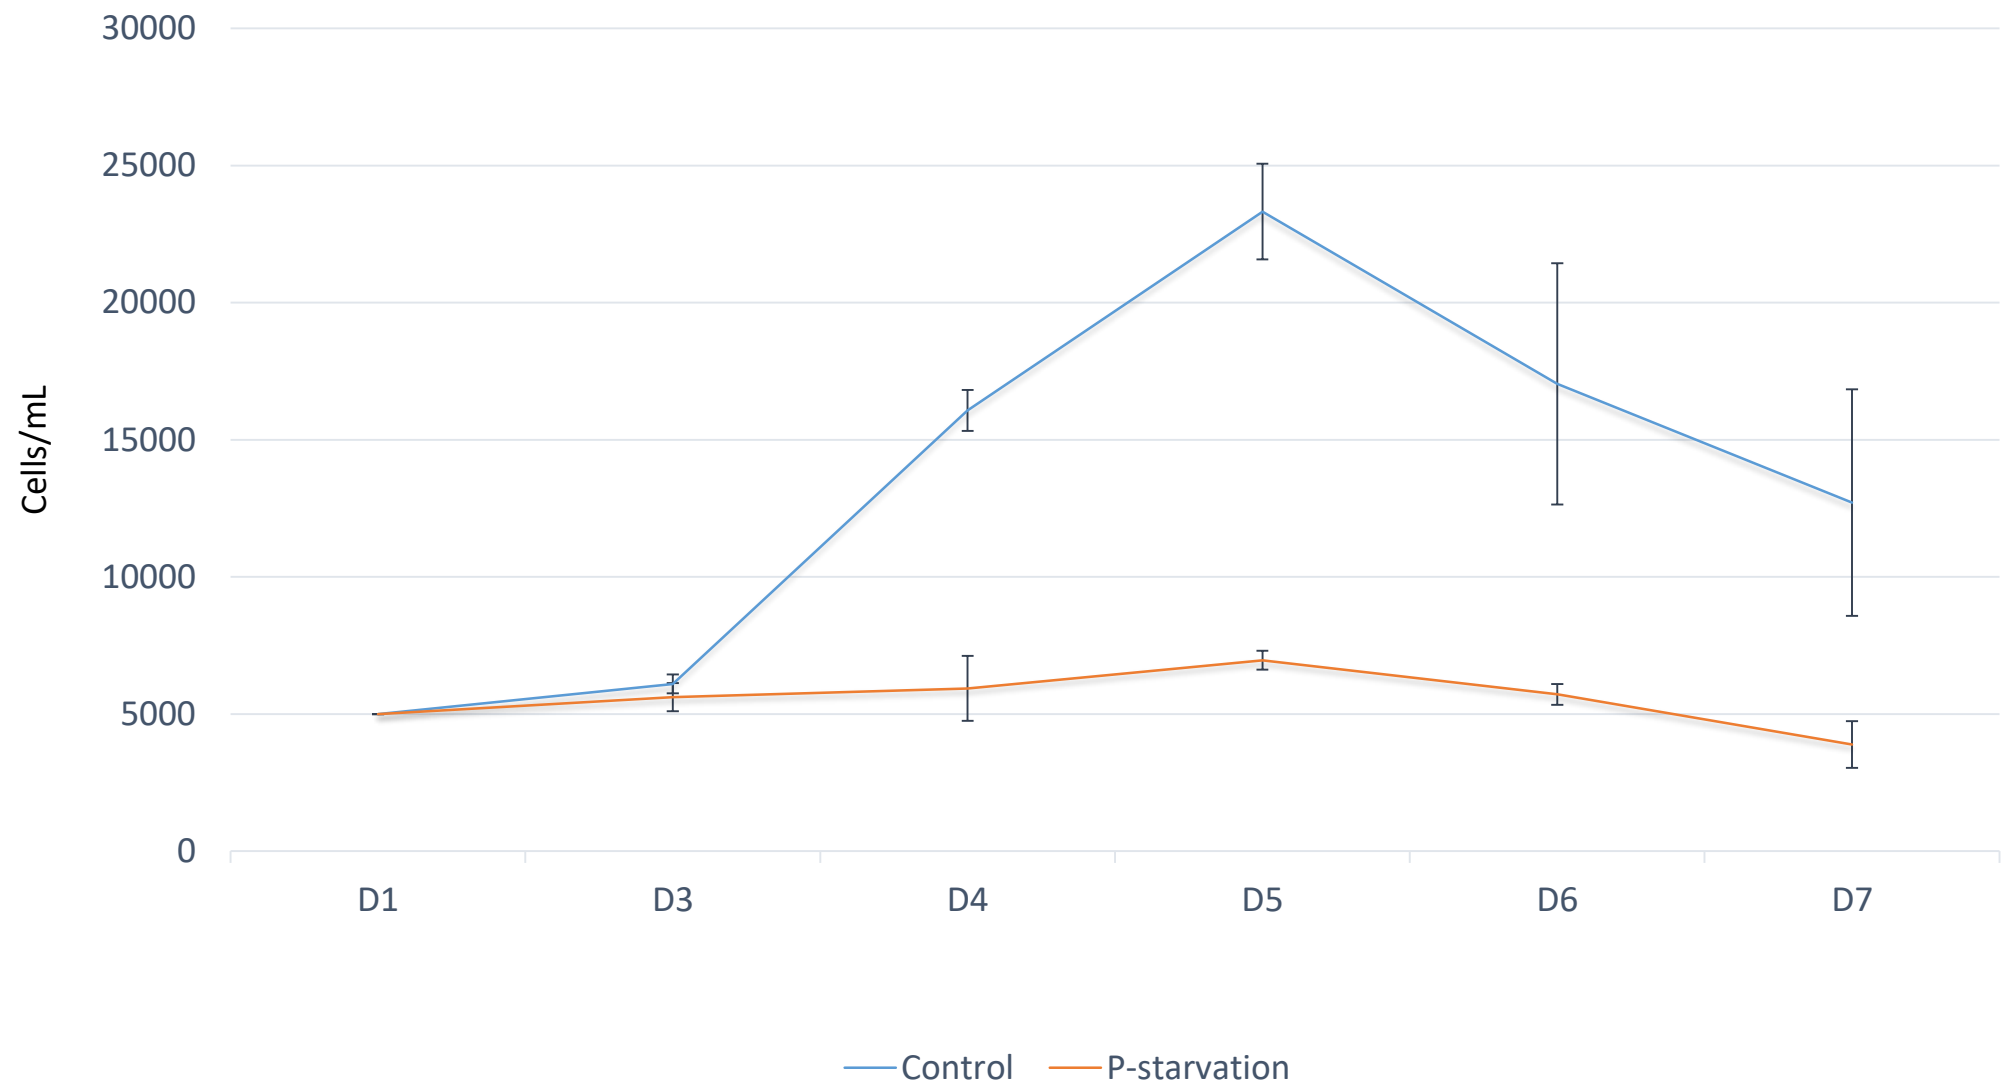

Supplement: s1 [file s1]

A. Cellular components

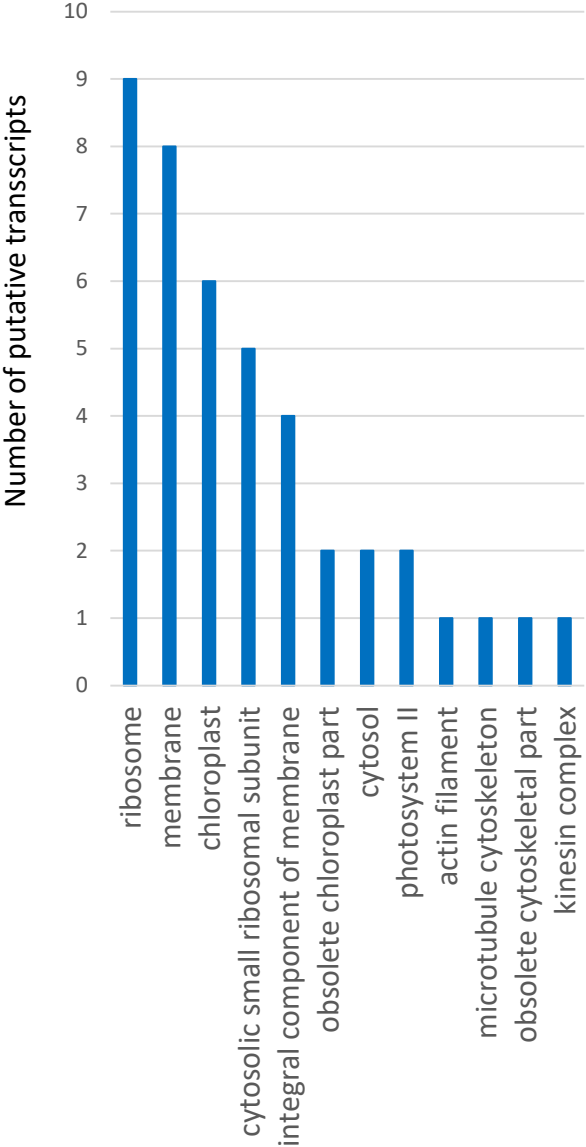

B. Biological process

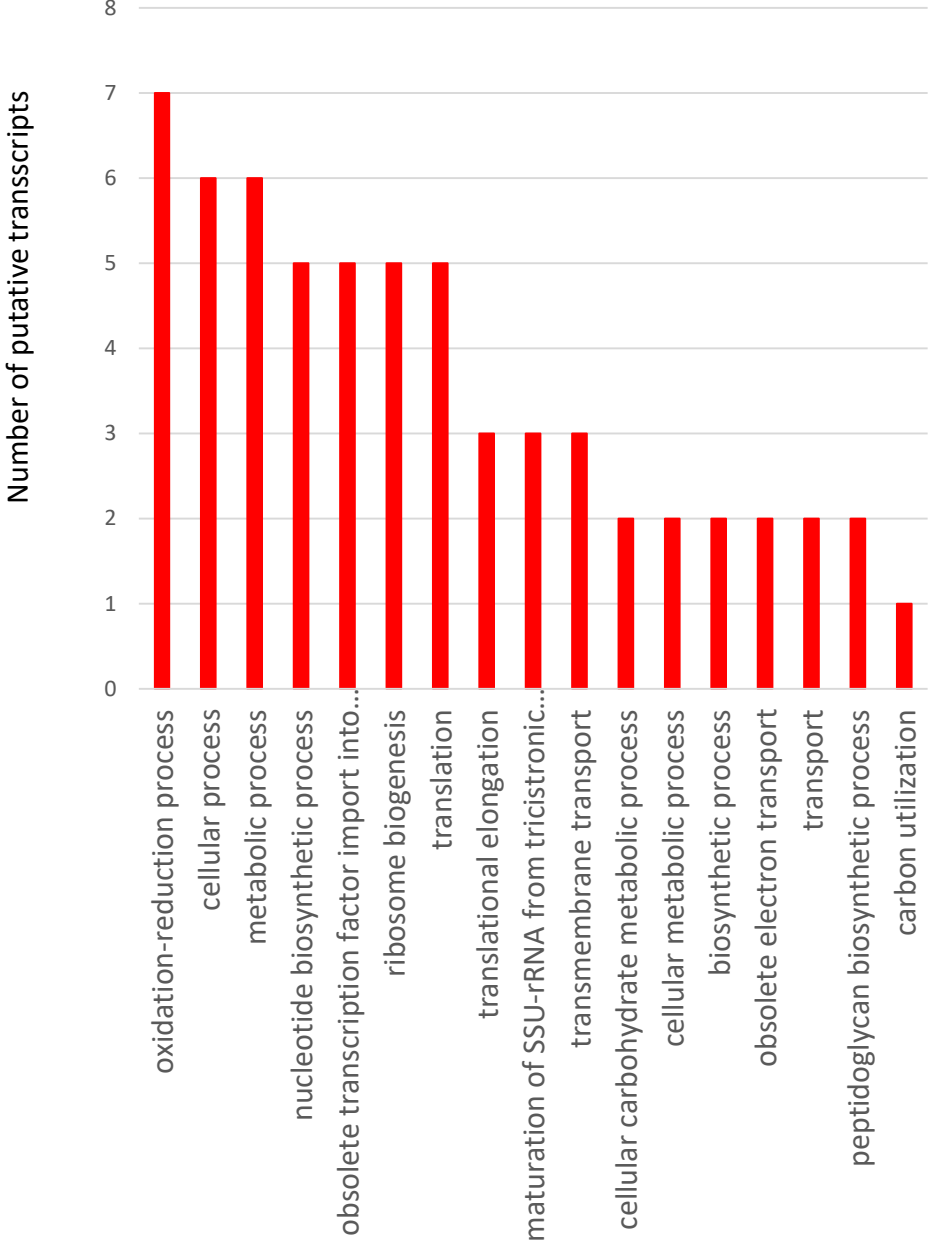

C. Molecular function

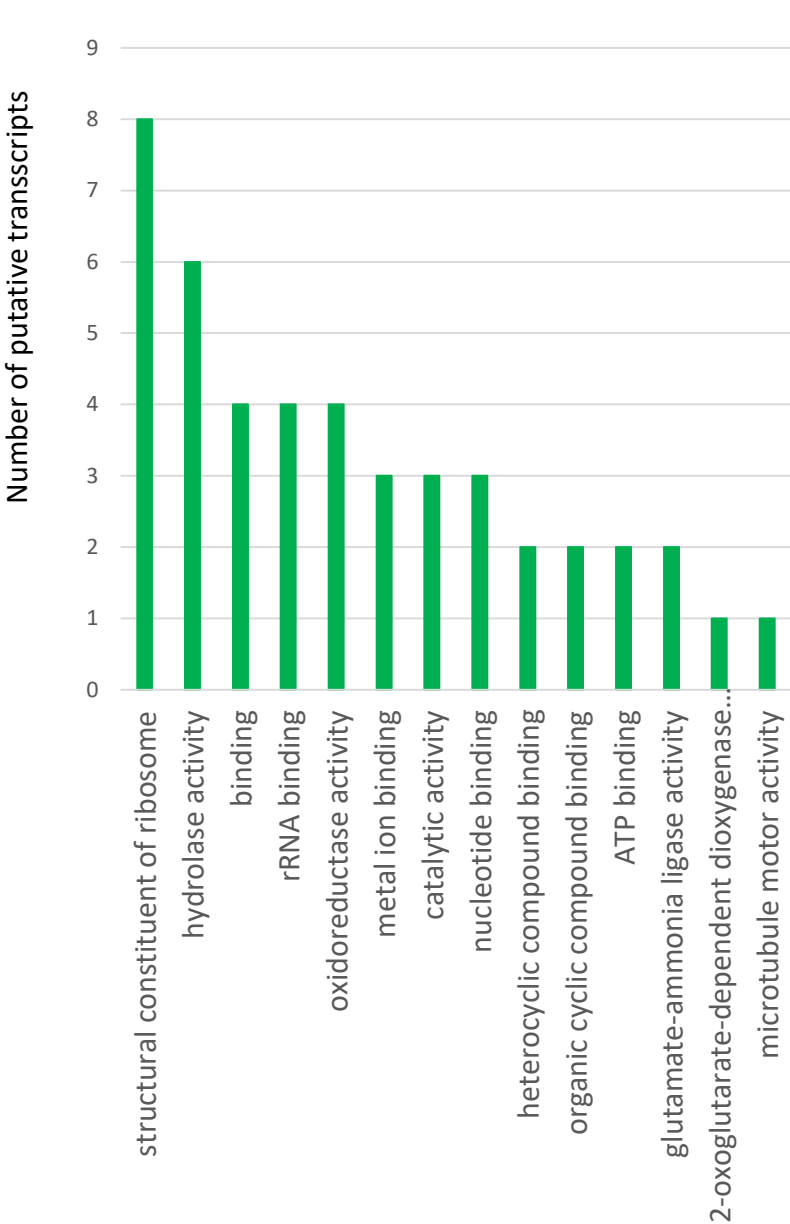

Supplement: s1 [file s1]
